# Supplementary material for: Social media addiction and its association with sleep quality and anxiety: A school-based cross-sectional study from Nepal.
Source: Research Square preprint supplement (doi:10.21203/rs.3.rs-5783624/v1), 2025-01-16
Supplement: Supplementary file 1 [file b18fed2c7fab3f9630b7ad8c.docx]

**Correlation between social media addiction, sleep quality and anxiety (n=418)**

| Correlations | | Social media addiction score | PSQI score | Anxiety score |
| --- | --- | --- | --- | --- |
| Social media addiction | Correlation coefficient | 1.000 | .363* | .378* |
| Sig. (2-tailed) | . | .000 | .000 |
| PSQI score | Correlation coefficient | .363* | 1.000 | .455* |
| Sig. (2-tailed) | .000 | . | .000 |
| Anxiety score | Correlation coefficient | .378* | .455* | 1.000 |
| Sig. (2-tailed) | .000 | .000 | . |

* correlation is significant at the 0.01 (2-tailed)
